# Supplementary material
Source: HighWire-hosted journal article supplement (https://bmjopen.bmj.com/content/10/8/e034854)
Supplement: inline-supplementary-material-2 [file inline-supplementary-material-2.pdf]

| Name | Identification |      | Status | Registration |      | Registration number |     | Registration date |        | Registration type |             | Registration status |            | Registration details |             | Registration location |             | Registration contact |                 | Registration notes |                          | Date |
|------|----------------|------|--------|--------------|------|---------------------|-----|-------------------|--------|-------------------|-------------|---------------------|------------|----------------------|-------------|-----------------------|-------------|----------------------|-----------------|--------------------|--------------------------|------|
|      | Number         | Code |        | Country      | Year | Month               | Day | Hour              | Minute | Second            | Millisecond | Microsecond         | Nanosecond | Picosecond           | Femtosecond | Attosecond            | Zeptosecond | Yoctosecond          | Registration ID | Registration URL   | Registration description |      |
|      |                |      |        |              |      |                     |     |                   |        |                   |             |                     |            |                      |             |                       |             |                      |                 |                    |                          |      |
